# Supplementary material for: All together now: Analogies between chimera state collapses and epileptic seizures
Source: PubMed Central journal article supplement (PMC4783711; doi:10.1038/srep23000), 2016-03-09
Supplement: srep23000-s1.pdf [file srep23000-s1.pdf]

# Supplementary Information

## **All together now: Analogies between chimera state collapses and epileptic seizures**

Ralph G. Andrzejak<sup>1</sup>, Christian Rummel<sup>2</sup>, Florian Mormann<sup>3</sup>, Kaspar Schindler<sup>4</sup>

**Supplementary Figure 1-5**

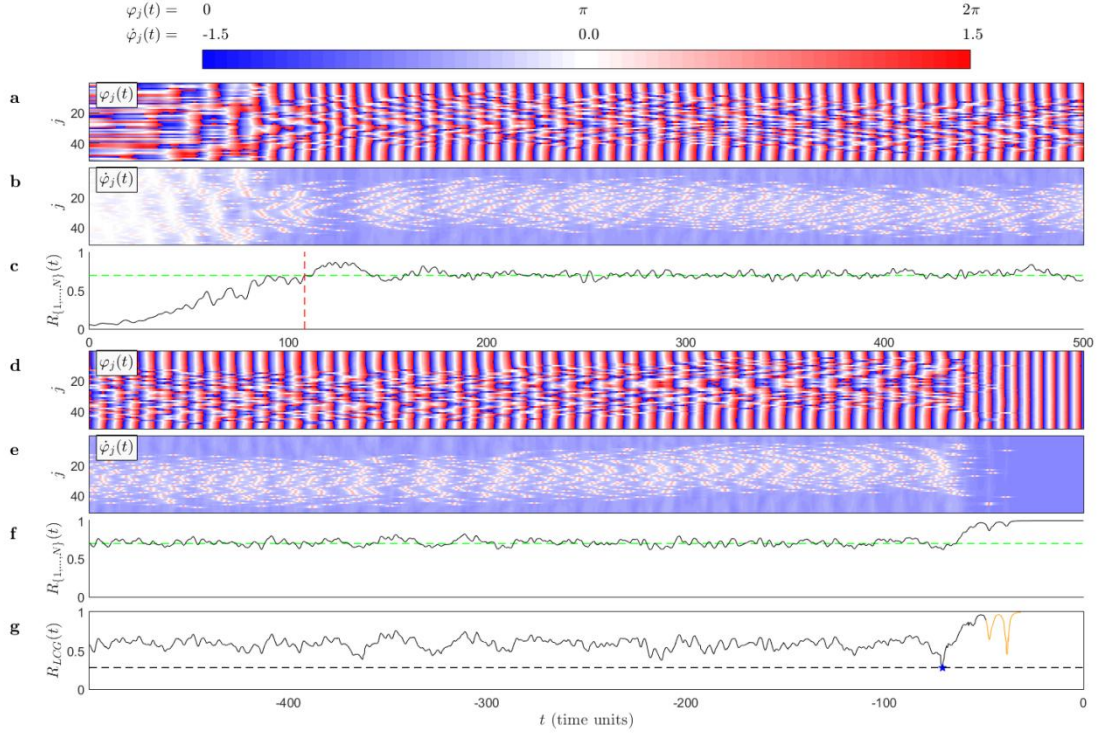

**Supplementary Fig. 1: Formation and collapse of a chimera state**

Panels **(a, b, d, e)** are analogous to panels (a) and (b) of Fig. 1, but for longer intervals including the formation and collapse of a chimera state. Phases  $\varphi_j(t)$  **(a)** and phase velocities  $\dot{\varphi}_j(t)$  **(b)** after the initialization with random phases. Time is given relative to the start of the network at  $t_{ST}$ . The global order parameter  $R_{\{1,\dots,N\}}(t)$  in panel **(c)** is used to detect the time of the initial chimera state formation  $t_{IF}$  indicated by the red vertical line. The green horizontal line indicates the threshold used in this detection. During the existence of the chimera state, HCG oscillators show a regular ripple pattern in their phases and only little fluctuations in their phase velocities. Oscillators belonging to the LCG show an irregular phase evolution and time-dependent phase velocities. Red spots in the profile of the phase velocities  $\dot{\varphi}_j(t)$  correspond to intermittent changes of the sense of rotation. Panels **(d-f)** are the same as **(a-c)** but here for the collapse of a chimera state. Time is given relative to onset of the fully synchronized state at  $t_{FS}$ . For this realization, the collapse took place at  $0.7 \cdot 10^6$  time units. While the global order parameter can be used to determine the times  $t_{IF}$  and  $t_{FS}$ , it does not show the hypo-coherence event. This can only be detected in the LCG order parameter  $R_{LCG}(t)$  which is shown in panel **(g)**. We applied circular shifts to the indices of the ring to maintain the LCG in the center of the display.



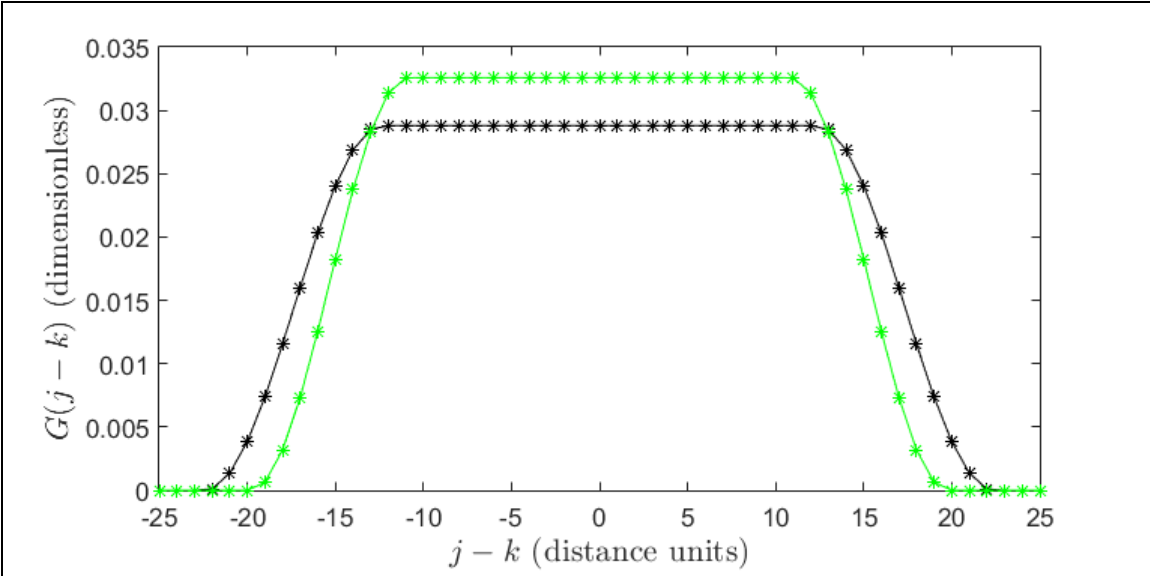

**Supplementary Fig. 3: Coupling kernel functions**

Nonlocal coupling kernels  $G(j - k)$  as a function of the distances between oscillators on the ring  $j - k$ . Black: Kernel with default parameters used throughout the study ( $B = 44.8$  and  $r = 0.45$ ) Green: Kernel with  $B = 39.6$  and  $r = 0.45$ , values exclusively used for the simulation shown in Supplementary Fig. 4. The kernels are defined for all values between  $-25$  and  $25$ . They are, however, only sampled at integer values, indicated by asterisks, since the distances between oscillators are integers.

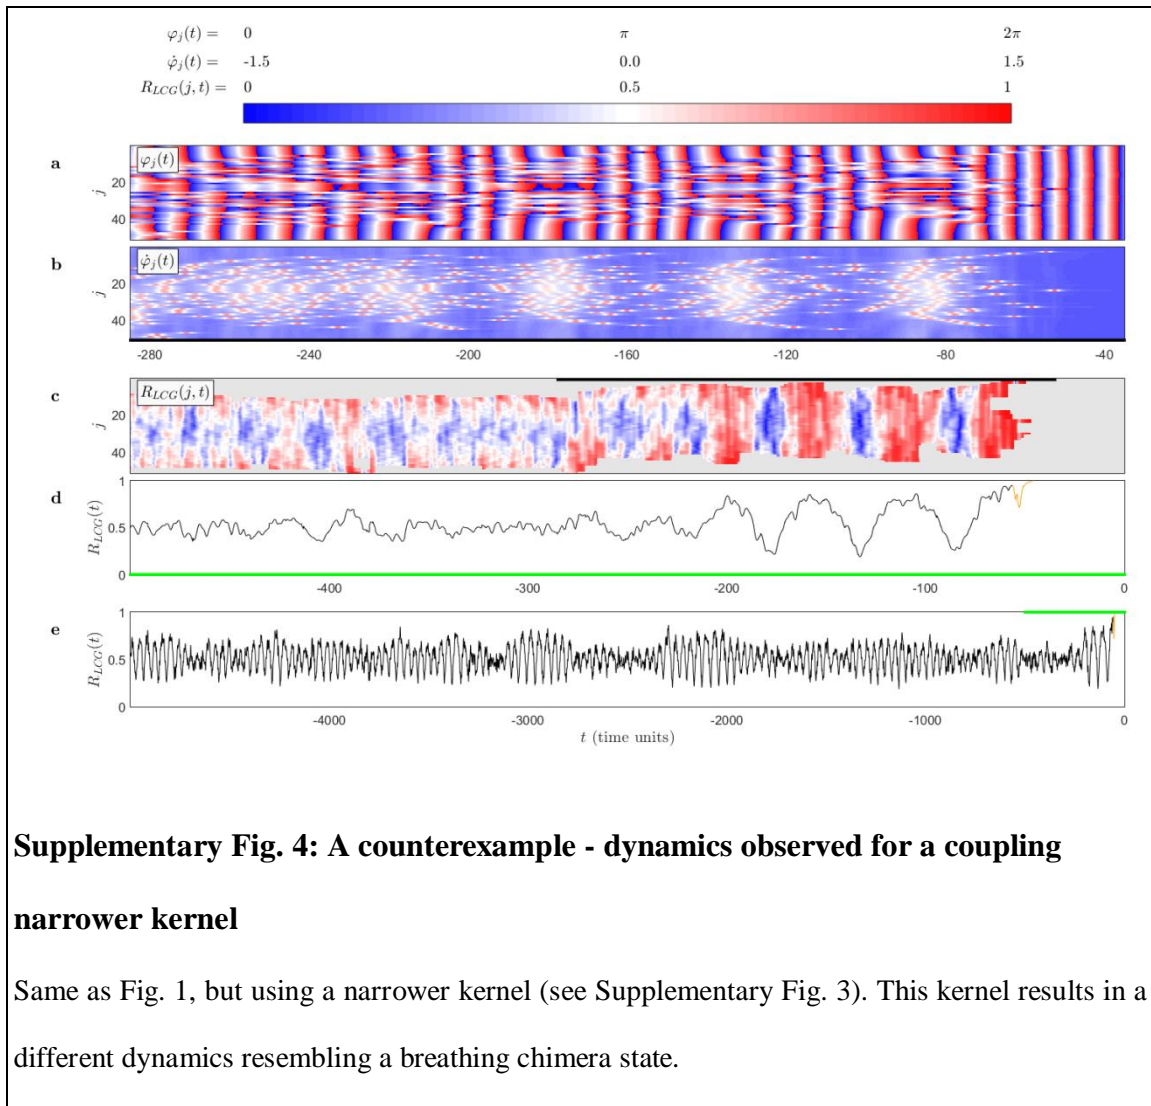

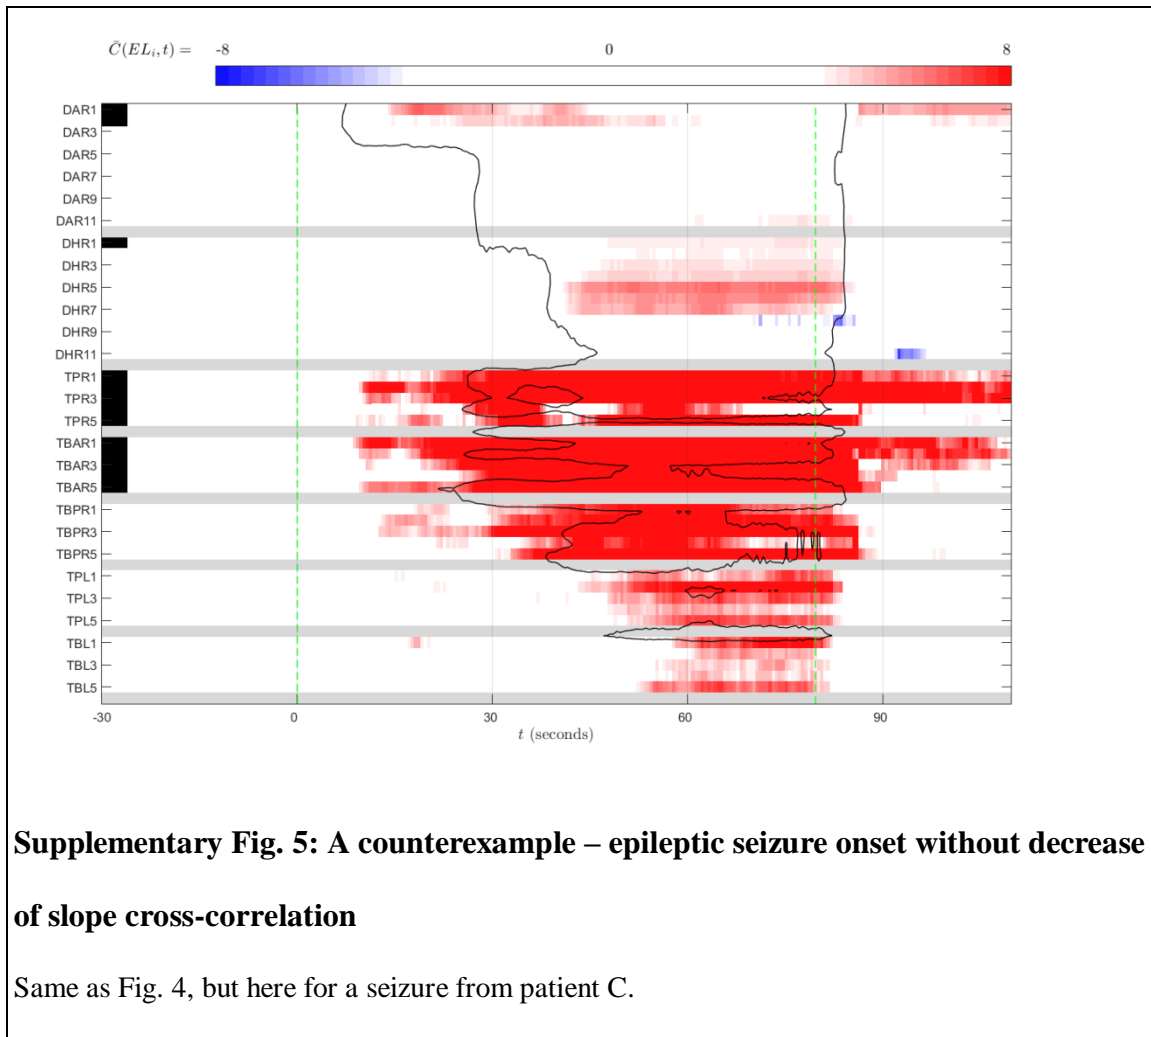

**Supplementary Fig. 5: A counterexample – epileptic seizure onset without decrease of slope cross-correlation**

Same as Fig. 4, but here for a seizure from patient C.
